# Supplementary material
Source: ML conference proceedings conference paper supplement (https://openreview.net/forum?id=y0KyBu5gfz)
Supplement: supplementary_material [file vgbench___supp.pdf › vgbench_supp/vgbench___supp.pdf]

## A VIDEOGAMEBENCH RULES

In this section, we provide more details on the rules used for experiments run in Table 2 and Table 3. Firstly, we allow each agent to be prompted with basic information about the game setting and the game controls. Secondly, the game environment is only allowed to provide the raw game frames as input. Finally, we define a set of rules for determining when a run is over on VideoGameBench. We specifically allow runs to continue even after an agent has failed / “game over”d multiple times, and also note that some games do not have an end state other than completing the game (e.g. *The Incredible Machine*). We currently specify a simple rule of  $20\times$  the time of the particular walkthrough for each game on VideoGameBench. For VideoGameBench Lite, we impose a similar restriction but assume **each step is one second of playtime**.

| VideoGameBench               | Max Runtime | VideoGameBench Lite          | Max Steps |
|------------------------------|-------------|------------------------------|-----------|
| Zelda: Link’s Awakening (DX) | 34:50:40    | Zelda: Link’s Awakening (DX) | 101,440   |
| Doom II                      | 81:44:00    | Doom II                      | 297,840   |
| Kirby’s Dream Land DX        | 6:21:00     | Kirby’s Dream Land (DX)      | 21,603    |
| Need for Speed               | 30:32:20    |                              |           |
| The Incredible Machine       | 43:03:00    |                              |           |
| Pokemon Crystal              | 226:30:40   |                              |           |
| Civilization                 | 4:58:12     |                              |           |

Figure 3: To determine when a run ends in VideoGameBench, we provide a bound of  $20\times$  the length of the scraped walkthroughs in Table 7. For VideoGameBench Lite, we use a similar metric, but determine time by translating one step to one second. Time is in the format (hours:minutes:seconds).

For information on the **stricter** set of rules we applied for our experiments due to budget constraints, see Appendix D.1

## B PROMPTS FOR VIDEOGAMEAGENT EXPERIMENTS

In this section, we provide all prompts used for our experiments. These prompts also serve as a starting point for future agents on VideoGameBench, and can be modified if they fall within the rules.

### B.1 EMULATOR-SPECIFIC PROMPTS

We provide prompts that are specific to a particular emulator. In the MS-DOS prompt for our experiments, we incorrectly included a paragraph about an overlay in our prompt, but note that this overlay **was not** used in any experiments in § 4.

#### Instructions for MS-DOS Games

You are a computer agent that uses the ReACT (Reasoning, Action, Observation) framework with memory to play a video game. For each step, you should:

1. Think: Analyze the current state and decide what to do next
2. Action: Choose one of the following actions:
  - click [options as action\_input]: Click the mouse at the current mouse position. Options include:
    - \* right: Right click instead of left click (default is left click)
    - \* shift: Hold shift while clicking
    - \* ctrl: Hold ctrl while clicking
    - \* alt: Hold alt while clicking
  - move x,y: Move the mouse to (x, y), where x is 0 on the left and 640 on the right, and y is 0 on the top and 400 on the bottom.
  - drag x,y: Drag (move while left button is down) to (x, y) from the current mouse position, where x is 0 on the left and 640 on the right, and y is 0 on the top and 400 on the bottom.

Multiple modifiers can be combined with +, e.g. "shift+ctrl"

```

918
919 - scroll_up amount: Scroll up by the specified amount
920 - scroll_down amount: Scroll down by the specified amount
921 - write text: Type the specified text
922 - press_key key: Press a specific key or key combination
923 - hold_key key[,duration]: Hold a key down for a specific duration
924 (default 0.5 seconds)
925 3. Observation: You will receive the result of your action
926
927 You will interact with the game via the keyboard and mouse actions.
928 To help you with mouse actions, we provide a thin red grid overlay
929 that intersects the screen at 100x100 pixel intervals (labelled
930 with coordinates divided by 100). I also added 4 blue dots 25
931 pixels away in each direction with their exact coordinates in
932 case you get lost. The coordinates start at (0,0) at the top
933 left of the screen, indexed (x,y) and go up to (640,400) at the
934 bottom right. For example, if you want to click somewhere inside
935 a box with top left corner at (100,100) and bottom right corner at
936 (150,150), you can move to (125,125) then click (estimate based on
937 the picture! Try to get it as close as possible, don't rely on
938 multiples of 10).
939
940 For keyboard actions, use the following format:
941 - Single keys: "KeyA", "KeyB", "Digit1", "ArrowLeft", "ArrowUp",
942 "Enter", "Escape", "Backspace", "Tab", "Space"
943 - Special keys: "Control", "Alt", "Shift", "Meta"
944 - Key combinations (use + symbol): "Control+KeyC", "Shift+ArrowUp",
945 "Alt+F4"
946 - Sets of Key combinations (multiple keys pressed at the same time):
947 "KeyA,Shift+KeyB"
948
949 Respond in the following JSON format:
950 {
951   "thought": "your reasoning about what to do next",
952   "action": "one of the available actions",
953   "action_input": "parameters for the action",
954   "memory": "important information to remember for future steps"
955 }
956
957 To not update memory, respond with an empty string.
958
959 For example:
960 {
961   "thought": "I need to left click on the search box",
962   "action": "click",
963   "action_input": "",
964   "memory": "1. My short term plan is to capture the enemy flag.\n
965 2. My opponent is trying to block my path, I should be wary.\n
966 3. Farms make my units stronger.\n
967 4. The M button is to move units."
968 }
969
970 Another example of right clicking:
971 {
972   "thought": "I need to right click on the search box",
973   "action": "click",
974   "action_input": "right",
975   "memory": ""
976 }
977
978 Or for keyboard actions:
979 {
980   "thought": "I need to move the character left in the game",
981   "action": "press_key",
982   "action_input": "ArrowLeft",

```

972  
973  
974  
975  
976  
977  
978  
979  
980  
981  
982  
983  
984  
985  
986  
987  
988  
989  
990  
991  
992  
993  
994  
995  
996  
997  
998  
999  
1000  
1001  
1002  
1003  
1004  
1005  
1006  
1007  
1008  
1009  
1010  
1011  
1012  
1013  
1014  
1015  
1016  
1017  
1018  
1019  
1020  
1021  
1022  
1023  
1024  
1025

```
"memory": "The character moves faster when holding the arrow key
down instead of tapping it."
}
Do NOT wrap anything in ``json`` tags, and only respond with the
JSON object.
Always analyze the screenshot carefully to determine the correct
coordinates for your actions.
The memory field should contain any important information you want
to remember for future steps.
```

We also separately prompt the Game Boy emulator games for the Lite version of the benchmark. Although we could have done the same for the MS-DOS games, we chose not to.

### Instructions for Game Boy Games

You are an AI agent playing a Game Boy game. You will receive game screens as images and must decide what buttons to press. Feel free to skip the start screen and play a new game. Your goal is to play the game effectively by analyzing the visual information and making appropriate decisions. You should respond with a list of (or single) actions to perform in sequence (each is performed for roughly 1/4 second) and wrapped in ``actions`` tags. You can repeat actions to maintain pressure on the buttons. To press multiple buttons simultaneously, group them in a tuple. Example response format: ``actions

```
[
    "A",                # Press A button
    ("B", "UP"),        # Press B and UP simultaneously
    "RIGHT",            # Press RIGHT
    "START",            # Press START
    ("A", "B", "DOWN")  # Press A, B, and DOWN simultaneously
]
```

### Instructions for Game Boy Games on VideoGameBench Lite

You are an AI agent playing a Game Boy game. You will receive game screens as images and must decide what buttons to press. Feel free to skip the start screen and play a new game. Your goal is to play the game effectively by analyzing the visual information and making appropriate decisions. You should respond with a list with a single (or tuple of) buttons to press for the Game Boy emulator (each is performed for roughly 1/2 second or 30 frames) and wrapped in ``actions`` tags. Please do not add comments to the response. Example response format (press A twice):

```
``actions
[
    ("A"),
    ("A"),
]
``
```

Another example of pressing multiple buttons simultaneously:

```
``actions
[
    ("A", "B", "DOWN")
]
``
```

Never press START and SELECT simultaneously, as this will restart the emulator.  
Available buttons: A, B, START, SELECT, UP, DOWN, LEFT, RIGHT

## B.2 GAME-SPECIFIC PROMPTS

We include game prompts provided to VG-Agent while playing each game on VideoGameBench (specifically the test split used in §4)

### Instructions for “Civilization I”

You are playing Civilization on DOS. Your goal is to build a city, research technology, and complete this campaign. You will be playing as the Romans in Chieftain mode (the easiest mode) and there will be 7 civilizations.

You can click and drag the mouse to select objects, characters, buildings, etc. and also use your keyboard keys to move.  
Game Objectives

Win Conditions: Achieve global dominance by conquering all other civilizations or be the first to send a spaceship to Alpha Centauri.

Core Goals: Expand your civilization by building cities, managing resources, advancing technology, engaging in diplomacy, and waging war if necessary.

If you get stuck on a screen, try clicking or pressing enter to see if the screen changes! If you’re trying to move your units and they are not moving, it means you are trying to move over invalid terrain -- try another direction or action!

Make sure to remember all of the following facts:

1. Ground troops cannot walk through water (the blue regions), mountains, or other obstacles.
2. End your turn when you’re finished with what you want to do.
3. Each unit moves 1 tile. So if you want to move another unit, move the selected unit first.
4. In the beginning, a good strategy is to just explore and have your units move around and explore unseen areas.

#### General Controls

Mouse: Click to select units, cities, and menu options.  
Right-click may provide additional info.

#### Keyboard Shortcuts:

Movement: Arrow keys (or Numpad) to move selected unit.  
End Turn: Enter key.  
Access City Menu: Click on a city or press C.  
Change Tax/Science/Luxury Rates: F1 (Tax Advisor).  
Access Civlopedia: F10.  
Save Game: Shift + S.  
Load Game: Shift + L.  
View Military Advisor: F3.  
View Diplomacy Screen: F4.  
View World Map: F5.

#### City Management

Found City: Move settler unit to an empty tile and press B.  
Manage Production: Click on a city, then choose what to build (units, buildings, wonders).  
Adjust Citizen Tasks: Click on tiles within city radius to assign workers.

#### Unit Management

Move Units: Use arrow keys or Numpad.  
Fortify Unit: Press F to make the unit stay in place and defend.

1080  
1081  
1082  
1083  
1084  
1085  
1086  
1087  
1088  
1089  
1090  
1091  
1092  
1093  
1094  
1095  
1096  
1097  
1098  
1099  
1100  
1101  
1102  
1103  
1104  
1105  
1106  
1107  
1108  
1109  
1110  
1111  
1112  
1113  
1114  
1115  
1116  
1117  
1118  
1119  
1120  
1121  
1122  
1123  
1124  
1125  
1126  
1127  
1128  
1129  
1130  
1131  
1132  
1133

Skip Turn: Spacebar.  
Disband Unit: Press D.  
Activate Next Unit: N key.

Combat & Diplomacy  
Attack Enemy: Move military unit onto an enemy unit or city.  
Negotiate Diplomacy: Open diplomacy screen (F4) and select a civilization to negotiate with.  
Declare War: Refuse enemy demands or attack their units/cities.

Research & Progression  
Select New Technology: Open the Science Advisor menu (F6) and choose a research path.  
Advance Eras: Progress by researching key technologies.  
Build Wonders: Unique, powerful structures that provide long-term benefits.

Unit Management  
Move: Arrow keys or Numpad (1-9, except 5) for movement.  
Fortify (F): Increases defense by 50%, unit remains stationary.  
Sentry (S): Unit does not require orders each turn but activates when an enemy approaches.  
Skip Turn (W): Temporarily skip a unit and return to it later.  
No Movement (Spacebar): Ends the unit's turn without action.  
Activate Fortified/Sentry Unit: Click the unit or select from the city menu.  
Unload from Ship (U): Unloads units from a transport ship.  
Go To Command (G): Orders the unit to move to a specified location.  
Change Home City (H): Assigns a new home city, used for air unit refueling.  
Disband (Shift + D): Removes the unit permanently.  
Pillage (Shift + P): Destroys improvements on a tile.

City Management  
Found a City (B): Settler establishes a new city.  
Grow a City (B in existing city): Settler increases city population.  
Manage Production: Select what to build (units, buildings, wonders).  
Adjust Citizen Tasks: Assign workers to different tiles.  
Set Tax/Science/Luxury Rates (F1): Adjust economy.

### Instructions for "The Need for Speed"

You are playing Need for Speed. You are sitting in your car at the starting line, ready to compete.  
Your goal is to win the race on each track.  
You need to shift gears (up) when starting the race to move forward.  
Move around the menu screen using the arrow keys (up and down), press Enter to start.

Controls:

- Steering: Arrow keys (← →) or move mouse left/right
- Accelerate/Brake: Up/Down arrows (↑ ↓) or Left-click/Right-click mouse
- Shift Gears: A (shift up) / Z (shift down)
- Hand Brake: Spacebar
- Horn: H
- Camera Views: C
- Pause: ESC or P

1134  
1135  
1136  
1137  
1138  
1139  
1140  
1141  
1142  
1143  
1144  
1145  
1146  
1147  
1148  
1149  
1150  
1151  
1152  
1153  
1154  
1155  
1156  
1157  
1158  
1159  
1160  
1161  
1162  
1163  
1164  
1165  
1166  
1167  
1168  
1169  
1170  
1171  
1172  
1173  
1174  
1175  
1176  
1177  
1178  
1179  
1180  
1181  
1182  
1183  
1184  
1185  
1186  
1187

#### Additional Function Keys:

- F1: Toggle window size
- F3: Toggle view distance
- F5: Mute sound
- F7: Toggle status bar
- F9: Toggle dashboard

To go forward after starting the race, you need to first shift gears up (e.g. press A), then hold up arrow, e.g. `hold_key ArrowUp 5000` (or some other large number). Be careful not to select too high of a number so you can react and turn (you need to move forward while turning to drift).

Get ready to race! Use your skills to outmaneuver opponents and claim victory on every track.

### Instructions for “The Incredible Machine”

You are playing The Incredible Machine, a puzzle game where you must use various mechanical objects and devices to solve Rube Goldberg-style challenges. Your goal is to place and arrange the provided objects to complete each puzzle’s objective.

#### Game Controls:

##### Mouse Controls:

- Left Click: Select and place objects
- Right Click: Remove placed objects
- Click and Drag: Move objects around the puzzle area

##### Keyboard Controls:

- Space: Start/Stop the machine
- R: Reset the puzzle
- ESC: Access menu
- F1: Help screen

#### Game Mechanics:

- Each puzzle provides specific objects you can use
- Objects must be placed in the correct positions to create chain reactions
- Physics affects how objects interact (gravity, momentum, bouncing)
- Some objects need to be precisely positioned to work properly

#### Common Objects:

- Ropes and pulleys: Transfer motion
- Conveyor belts: Move objects horizontally
- Springs: Bounce objects
- Motors: Provide continuous rotation
- Gears: Transfer rotational motion
- Balls and bowling balls: Roll and bounce
- Cats and mice: Animals that react to each other
- Balloons: Float upward
- Electrical switches: Trigger connected devices

#### Problem-Solving Tips:

1. Examine the puzzle goal carefully
2. Study the available objects
3. Consider how objects will interact
4. Test your solution in parts
5. Make small adjustments for timing
6. Watch for unintended interactions

1188  
1189  
1190  
1191  
1192  
1193  
1194  
1195  
1196  
1197  
1198  
1199  
1200  
1201  
1202  
1203  
1204  
1205  
1206  
1207  
1208  
1209  
1210  
1211  
1212  
1213  
1214  
1215  
1216  
1217  
1218  
1219  
1220  
1221  
1222  
1223  
1224  
1225  
1226  
1227  
1228  
1229  
1230  
1231  
1232  
1233  
1234  
1235  
1236  
1237  
1238  
1239  
1240  
1241

7. Use gravity to your advantage

Remember:

- There are often multiple solutions to each puzzle
- Timing is crucial for many puzzles
- Some objects may not be needed
- Pay attention to object orientation
- Chain reactions should flow naturally
- Save working parts while experimenting with others

If stuck:

- Reset and try a different approach
- Watch how objects interact during test runs
- Break down complex solutions into smaller steps
- Consider unconventional uses for objects
- Look for visual hints in the puzzle design

### Instructions for "Pokemon Crystal"

You are playing Pokemon Crystal version. Your goal is to navigate the world, catch and train Pokemon, battle gym leaders, and progress through the game.

You start as a young trainer in Pallet Town, choosing between Bulbasaur, Charmander, or Squirtle as your starter Pokemon. Your ultimate goal is to defeat the Elite Four and become the Pokemon Champion, while completing your Pokedex by catching all 151 original Pokemon.

Analyze the current game screen and decide what buttons to press. Respond with a sequence of actions to perform.

Think step by step:

1. What is happening in the current screen?
2. What action would be most appropriate?
3. What buttons need to be pressed to take that action?

Available buttons: A, B, START, SELECT, UP, DOWN, LEFT, RIGHT

Tips:

1. To get past any menu or typing screen, press START or START, A when you are done. No matter where your arrow is on the screen, it'll go to the end.
2. When trainers see you, they will want to battle.
3. In a Pokemon battle, you attack your enemies and you lose if your Pokemon all reach 0 HP.
4. When typing a name, just press A twice to exit when your name is full.
- Don't go right then A.
5. Wild Pokemon appear randomly when walking in tall grass, caves, or while surfing.
6. During battles (using the movement keys to move icons):
  - Choose "FIGHT" to use your Pokemon's moves
  - Choose "BAG" to use items like Potions or Pokeballs
  - Choose "POKEMON" to switch to a different Pokemon
  - Choose "RUN" to attempt escaping from wild Pokemon battles
7. Type advantages are crucial: Water beats Fire, Fire beats Grass, Grass beats Water
8. Use Pokemon Centers (buildings with red roofs) to heal your Pokemon for free
9. Buy supplies like Pokeballs and Potions at PokeMarts (buildings with blue roofs)
10. Read dialogue and continue by pressing 'A'.

1242  
1243  
1244  
1245  
1246  
1247  
1248  
1249  
1250  
1251  
1252  
1253  
1254  
1255  
1256  
1257  
1258  
1259  
1260  
1261  
1262  
1263  
1264  
1265  
1266  
1267  
1268  
1269  
1270  
1271  
1272  
1273  
1274  
1275  
1276  
1277  
1278  
1279  
1280  
1281  
1282  
1283  
1284  
1285  
1286  
1287  
1288  
1289  
1290  
1291  
1292  
1293  
1294  
1295

Each movement key (e.g. UP, DOWN, LEFT, RIGHT) will move your character (with the hat) one tile in that direction. Keep that in mind, and calculate where to go based on what you want to do.

You can interact with people (you should to get information and also proceed in the game) using the A button by standing next to them.

### Instructions for "Doom II"

You are playing Doom II on DOS. Your goal is to complete the game by defeating all the levels. Explore all rooms as much as possible. The enemies are wearing red and green with dark green heads. If they are not moving, they are probably dead. Do not confuse them with random objects.

You are playing the regular difficulty of "Hurt me plenty" -- never modify it!

Do NOT FORGET the following:

1. Look for doors, which will be in the corridors and have some kind of writing on the door (e.g. UAC is a door). You can open them! Try aligning yourself so the door is centered on your screen, then walk up to it. When you're pressed against the door, press space to open it.
2. Doors usually have blue triangles (they themselves are not doors) near them on the sides, and it will be obvious you can open it.
3. You need to be directly in front of the door and press 'space' to open it, you cannot be far away to open it. Don't just go backwards because you're not sure.
4. If you get stuck on a wall or moving against a wall, try taking a few steps back and re-adjusting your thoughts.
5. If there are a lot of enemies or you are being shot at, try strafing around and moving a lot side to side to avoid getting fired at while also aiming and shooting.

Remember exactly what direction you were turning so you don't make redundant movements. Use the repeated key presses to turn. You can also move your character to adjust your aim. If YOU SHOT AND IT DID NOTHING, IT PROBABLY MEANS YOU WERE OFF TARGET. Re-adjust.

Keep moving forward until your screen doesn't change. Do not gaslight yourself into thinking you're stuck at a door when you are not. You will know easily when you are stuck.

You should aim and kill any enemy you see, do not just walk past them, as they will shoot you once you pass them. If it does walk past you, remember that it is now behind you in your memory -- do not forget, and turn around and make sure you eliminate them.

If your screen flashes red it might mean that you're being shot, turn around if you dont see an enemy in front of you to check is an enemy is shooting you from the back.

Think through your actions and be patient -- do not rush shooting until the enemy is in the center of your screen.

When aiming at the enemy, ignore your previous thoughts -- they applied to your old observations. For example, if they were centered in your thoughts before,



1296  
1297  
1298  
1299  
1300  
1301  
1302  
1303  
1304  
1305  
1306  
1307  
1308  
1309  
1310  
1311  
1312  
1313  
1314  
1315  
1316  
1317  
1318  
1319  
1320  
1321  
1322  
1323  
1324  
1325  
1326  
1327  
1328  
1329  
1330  
1331  
1332  
1333  
1334  
1335  
1336  
1337  
1338  
1339  
1340  
1341  
1342  
1343  
1344  
1345  
1346  
1347  
1348  
1349

they might not be centered anymore, and you will need to re-adjust.  
Look at your most recent observation to make sure.  
Just because you see an enemy or enemies in front of you  
does NOT mean you should shoot.  
Carefully align your gun so they are exactly at the center.  
Don't just blindly shoot.  
Focus on ONE enemy at a time. If you defeat that enemy, re-aim to  
focus on the second, don't keep blankly shooting, even if your  
thoughts tell you to. You need to aim.

Move with the arrow keys to adjust your aim, more controls below.  
In general, you can chain multiple keys in sequence (e.g. if the  
enemy is slightly to the right, ArrowRight,Control)

Basic Controls:

- Repeat 'ArrowLeft' or 'ArrowRight' 14 times separated by commas  
to turn left and right 90 degrees if you want to turn a corner.
- Repeat W multiple times separated by commas,  
e.g. press\_key W,W,W,W,W,W if you want to explore forward.
- Control: Fire weapon
- Space: Open door / interact

For finer control when dealing with enemies:

- ArrowLeft, ArrowRight: Look left and right to adjust your aim and  
look around
- W, A, S, D: Move forward, left, back, right
- Shift + W, A, S, D: Run forward, left, back, right

### Instructions for "Kirby's Dream Land"

You are playing Kirby's Dream Land on the Game Boy. You control  
Kirby, a round hero who can walk, jump, inhale enemies, and fly.  
Your goal is to progress through levels, defeat enemies, and  
overcome bosses to eventually save Dream Land.

Analyze the current game screen and decide what buttons to press.  
Think through each situation step by step:

1. Assess the current screen:

- What enemies or obstacles are present?
- Is Kirby on the ground or in the air?
- Are there any platforms or doorways?
- Is there a boss battle happening?

2. Consider your options:

- Do you need to avoid enemies?
- Should you inhale enemies to use as projectiles?
- Is flying a better option than walking?
- Are there items or power-ups to collect?

3. Plan your next action and execute using the available controls:

MOVEMENT CONTROLS:

- LEFT/RIGHT on Control Pad: Move Kirby left/right
- UP on Control Pad: Enter doorways or fly upward
- DOWN on Control Pad: Crouch and swallow inhaled enemies

ACTION BUTTONS:

- A Button: Jump
- B Button: Inhale enemies/objects or spit them out as projectiles
- START Button: Pause the game

1350  
1351  
1352  
1353  
1354  
1355  
1356  
1357  
1358  
1359  
1360  
1361  
1362  
1363  
1364  
1365  
1366  
1367  
1368  
1369  
1370  
1371  
1372  
1373  
1374  
1375  
1376  
1377  
1378  
1379  
1380  
1381  
1382  
1383  
1384  
1385  
1386  
1387  
1388  
1389  
1390  
1391  
1392  
1393  
1394  
1395  
1396  
1397  
1398  
1399  
1400  
1401  
1402  
1403

#### VITALITY AND CHANCES:

- Kirby has 6 vitality bars that decrease when hit by enemies
- Losing all vitality bars costs one chance (life)
- Game ends when all chances are depleted

#### SPECIAL NOTES:

- You can float indefinitely by repeatedly pressing the A button
- Inhaled enemies can be used as projectile weapons
- During boss battles, watch the boss's vitality bar above Kirby's
- If stuck, you can reset the game by pressing A, B, START, and SELECT simultaneously

A few things you should ALWAYS remember:

1. For things that say "IN" or black doors / light doors, Kirby has to go into it to go into a room. Don't just hover above it.
2. Shining stars (called warp stars) are the end of the level, and transition you further into the game. Kirby has to go into it or step on it.
3. Do not hit enemies directly, or Kirby will take damage. Spit out enemies (not bosses) or items like bombs back to damage your enemies!

Kirby is a classic platformer, so you generally should continue to the right to progress in the game. Respond with a clear sequence of actions, explaining your reasoning for each decision.

Available buttons: A, B, START, SELECT, UP, DOWN, LEFT, RIGHT

### Instructions for "The Legend of Zelda: Link's Awakening (DX)"

You are an expert playing The Legend of Zelda: Link's Awakening on Game Boy. Your goal is beat the game flawlessly by navigating the world, solving puzzles, defeating enemies, and progressing through dungeons. You cannot walk through walls or doors, so try stepping back or around them!

#### Controls:

- Arrow keys: Move Link around, move options around in a menu.
- A: Use Item Box A. Also for proceeding with dialogue.
- B: Use Item Box B.
- START: Open inventory.
- SELECT: View map or switch items

Analyze the current game screen and decide what buttons to press. Respond with a sequence of actions to perform.

Think step by step:

1. What is happening in the current screen?
2. Are there enemies, NPCs, or interactive objects?
3. What action would help progress in the game?
4. What buttons need to be pressed to take that action?

You cannot move if dialogue is on the screen until you finish it, so keep pressing A until it is over.

Available buttons: A, B, START, SELECT, UP, DOWN, LEFT, RIGHT

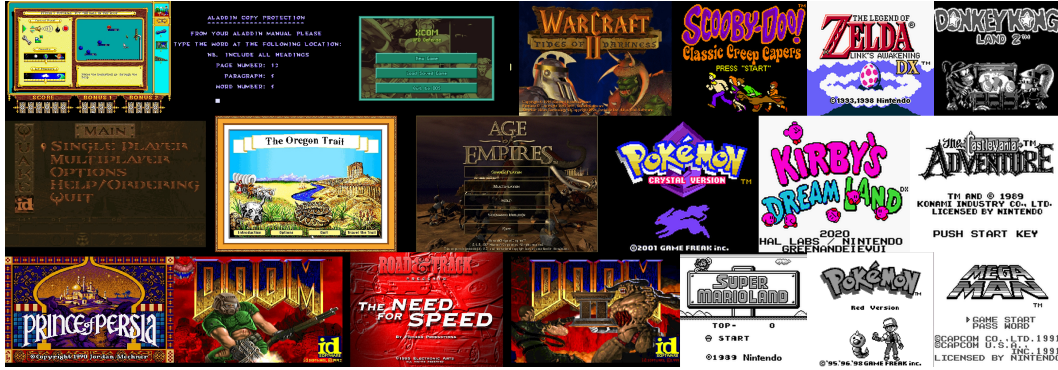

Figure 4: VideoGameBench features a set of 20 video games from the MS-DOS and Game Boy platforms that VLMs are tasked with playing to completion.

## C VIDEOGAMEBENCH DETAILS

In this section, we provide additional information on the VideoGameBench setup. We show all the public video games in the dev and test splits of VideoGameBench in Figure 4. We also provide more information of checkpoint detection.

### C.1 LIST OF AVAILABLE ACTIONS

Here, we list all the actions available that an agent can take on VideoGameBench for both Game Boy and MS-DOS games. For key or button presses, we explicitly allow the agent to specify how long they hold the keys for, but found this to be confusing because it is difficult to embed time into the agent’s context. We use a default time of half a second for key / button presses, but provide the option to change this default setting in the benchmark. We also allow agents to specify the length of their key presses.

#### C.1.1 LIST OF GAME BOY ACTIONS

Using the PyBoy (Mads Ynddal, 2025) interface, we enable agents on VideoGameBench to press the following buttons:

- A — Press the **A** button on the Game Boy emulator
- B — Press the **B** button on the Game Boy emulator
- SELECT — Press the **SELECT** button on the Game Boy emulator
- START — Press the **START** button on the Game Boy emulator
- RIGHT — Press the right arrow on the Game Boy emulator D-Pad
- LEFT — Press the left arrow on the Game Boy emulator D-Pad
- UP — Press the up arrow on the Game Boy emulator D-Pad
- DOWN — Press the down arrow on the Game Boy emulator D-Pad

#### C.1.2 LIST OF KEYBOARD AND MOUSE ACTIONS

Using the Playwright (Mads Ynddal, 2025) interface with JS-DOS (Guryanov, 2025), we enable agents to use the mouse and keyboard interface in the following way:

- click — Click the mouse at the current position. You can specify options like right-click or modifier keys (e.g., Shift, Ctrl, Alt).
- move — Move the mouse to a specific 2D pixel coordinate on the screen, e.g., "150, 200".
- drag — Drag the mouse to a target coordinate, simulating a click-and-drag motion.

- `scroll_down` — Scroll down by a specified number of pixels.
- `scroll_up` — Scroll up by a specified number of pixels.
- `write` — Type a string of text as keyboard input into the emulator.
- `press_key` — Press a single key or a sequence of keys (e.g., "Enter", "Ctrl,C").
- `hold_key` — Press and hold a key for a specified duration in seconds (e.g., "A,1.5" to hold A for 1.5 seconds).

## C.2 VERIFYING THAT VIDEOGAMEBENCH IS CAPABLE OF BEING COMPLETED

While each game in VideoGameBench has been completed by at least one human, we also provide evidence that our interface does not cause games to be impossible to solve. Using *PyBoy* and *Playwright*, we give agents sufficient access to press any button or set of buttons simultaneously that the emulator allows. Our human interface therefore enables the same controls as the emulator.

We focus instead on the information given to the agent, and only provide the human with the same information. In other words, the human only sees the most recent frame before taking an action. To simulate what a model “sees” before making an action, we only show the most recent frame to the human, who must make an action based on this frame and their own memory. Furthermore, the interface waits at least half a second before the action is made and the new frame is updated to the player. The emulator runs entirely in real-time, but the human is limited both in controls and perception by this fixed delay. Using this interface, the authors manually beat the first checkpoint of *Kirby’s Dream Land* and *Doom II*, both of which require real-time inputs.

## C.3 SCRAPING CHECKPOINTS FROM WALKTHROUGHS

We provide automatically trackable progress markers on VideoGameBench by scraping checkpoint frames from online available walkthroughs. In previous VLM-based playthroughs of video games such as *Gemini Plays Pokemon* (Joel Z [2025]), progress was manually marked by viewers. To help scale these experiments to several different games, we provide a system of finer, automatic tracking of progress.

Each video game in VideoGameBench has an associated walkthrough available through video streaming platforms such as YouTube. These playthroughs contain full, unedited gameplay of a human playing each video game to completion. Many of these videos contain timestamps with game checkpoints that we used to determine checkpoints, but we also scrape other suitable checkpoints as well. To add a checkpoint to a game, we require a (image-frame, timestamp) pair, which can be found directly from these videos.

## C.4 HOW CHECKPOINTS WERE DETERMINED

All games in VideoGameBench have a linear progression, which means there is a certain pre-defined path that a player must follow to complete the game. For example, while there are infinite possible trajectories in the game *Pokemon Red*, there are certain unavoidable story checkpoints (e.g. grab each Gym badge, defeat the Elite 4, etc.) that the player must reach. Furthermore, many of these story checkpoints are actually rendered the same. For example, when a player in *Pokemon Red* defeats a Gym Leader, the game will always render the same background with the player facing the Gym Leader and the same text, regardless of the previous trajectory taken by the player up to this point. We use these frames as checkpoint frames, and estimate progression based on when an online walkthrough has reached this frame.

In our setting, the easiest checkpoints to scrape are typically time-stamped for online walkthroughs, but there are often more available checkpoint frames that can be used. Adding more checkpoint frames increases the granularity of automatic progress detection, which we plan to expand on in the future.

Table 5: List of all checkpoints and their corresponding scores (as a percentage) on VideoGameBench. The only exception is The Incredible Machine, which scores each level equally from Levels 1–87.

| Test Set Game           | Checkpoint                               | Score (%) |
|-------------------------|------------------------------------------|-----------|
| Kirby's Dream Land DX   | Reach first warp star / mini-boss        | 4.81      |
|                         | Reach Stage 2 - Castle Lololo            | 13.82     |
|                         | Reach Lololo Mini-Boss                   | 20.21     |
|                         | Reach Stage 3 - Float Islands            | 28.17     |
|                         | Reach Stage 4 - Bubbly Clouds            | 43.48     |
|                         | Reach Kracko Jr. Mini-Boss               | 51.62     |
|                         | Reach Stage 5 - Mt. Dedede               | 66.58     |
|                         | Finish Credits                           | 100.00    |
| Pokémon Crystal         | Obtain first Pokemon from Oak            | 0.93      |
|                         | Defeat Johto Gym #1                      | 8.85      |
|                         | Defeat Johto Gym #2                      | 14.22     |
|                         | Defeat Johto Gym #3                      | 21.85     |
|                         | Defeat Johto Gym #4                      | 28.84     |
|                         | Defeat Johto Gym #5                      | 34.75     |
|                         | Defeat Johto Gym #6                      | 36.82     |
|                         | Defeat Rocket Executive                  | 41.17     |
|                         | Defeat Johto Gym #7                      | 43.40     |
|                         | Disband Team Rocket                      | 50.95     |
|                         | Defeat Johto Gym #8                      | 57.76     |
|                         | Kanto Champion (Defeat Lance)            | 67.23     |
|                         | Defeat Kanto Gym #1                      | 70.69     |
|                         | Defeat Kanto Gym #2                      | 73.52     |
|                         | Defeat Kanto Gym #3                      | 80.74     |
|                         | Defeat Kanto Gym #4                      | 84.20     |
|                         | Defeat Kanto Gym #5                      | 86.73     |
|                         | Defeat Kanto Gym #6                      | 89.75     |
|                         | Defeat Kanto Gym #7                      | 93.52     |
|                         | Defeat Kanto Gym #8                      | 95.22     |
|                         | Defeat Red                               | 100.00    |
| Legend of Zelda DX      | Grab Sword from the Beach                | 1.08      |
|                         | Collect the Full Moon Cello              | 10.32     |
|                         | Collect the Conch Horn                   | 16.68     |
|                         | Collect the Sea Lily's Bell              | 31.12     |
|                         | Collect the Surf Harp                    | 48.76     |
|                         | Collect the Wind Marimba                 | 62.85     |
|                         | Collect the Coral Triangle               | 76.04     |
|                         | Collect the Organ of Evening Calm        | 86.42     |
|                         | Collect the Thunder Drum                 | 96.17     |
|                         | Complete the Game (reach Owl)            | 100.00    |
| Civilization I          | Win a game on Chieftain, 7 civilizations | 100.00    |
| Need for Speed          | Get 1st on "City"                        | 12.54     |
|                         | Get 1st on "Coastal"                     | 24.19     |
|                         | Get 1st on "Alpine"                      | 37.81     |
|                         | Get 1st on "Rusty Springs"               | 44.88     |
|                         | Get 1st on "Autumn Valley"               | 54.68     |
|                         | Get 1st on "Burnt Sienna"                | 65.92     |
|                         | Get 1st on "Vertigo Ridge"               | 77.57     |
|                         | Get 1st on "Transtropolis"               | 89.54     |
|                         | Get 1st on "Lost Vegas"                  | 100.00    |
| The Incredible Machine* | Solve Level 1                            | 1.12      |
|                         | Solve Level 2                            | 2.24      |
|                         | Solve Level 3                            | 3.37      |
|                         | ⋮                                        | ⋮         |
|                         | Solve Level 87                           | 100.00    |

Table 6: Continuing from Table 5, Doom II checkpoints and their corresponding scores (as a percentage) on VideoGameBench.

| Test Set Game | Checkpoint    | Score (%) |
|---------------|---------------|-----------|
| Doom II       | Beat Stage 1  | 0.81      |
|               | Beat Stage 2  | 2.31      |
|               | Beat Stage 3  | 3.91      |
|               | Beat Stage 4  | 5.25      |
|               | Beat Stage 5  | 8.04      |
|               | Beat Stage 6  | 11.21     |
|               | Beat Stage 7  | 12.24     |
|               | Beat Stage 8  | 15.57     |
|               | Beat Stage 9  | 20.10     |
|               | Beat Stage 10 | 21.63     |
|               | Beat Stage 11 | 28.84     |
|               | Beat Stage 12 | 32.33     |
|               | Beat Stage 13 | 37.16     |
|               | Beat Stage 14 | 39.75     |
|               | Beat Stage 15 | 48.25     |
|               | Beat Stage 16 | 51.41     |
|               | Beat Stage 17 | 55.98     |
|               | Beat Stage 18 | 59.83     |
|               | Beat Stage 19 | 63.73     |
|               | Beat Stage 20 | 66.00     |
|               | Beat Stage 21 | 69.39     |
|               | Beat Stage 22 | 71.20     |
|               | Beat Stage 23 | 74.33     |
|               | Beat Stage 24 | 80.21     |
|               | Beat Stage 25 | 82.64     |
|               | Beat Stage 26 | 85.66     |
|               | Beat Stage 27 | 90.99     |
|               | Beat Stage 28 | 94.60     |
|               | Beat Stage 29 | 98.52     |
|               | Beat Stage 30 | 100.00    |

## C.5 PERCEPTUAL IMAGE HASHING FOR CHECKPOINT DETECTION

We provide a baseline hamming distance (Hamming, 1950) threshold of  $< 12$  for determining if two frames match, but enable the option to tune this parameter individually for each checkpoint in each game. For example, for *Kirby's Dream Land*, we choose between 6 – 8 for this threshold.

One limitation of applying perceptual hashing over full game screen images is when distinctions between checkpoints are local to a certain patch of the image. For example, in *The Incredible Machine*, the level completion screen is a tiny textbook that indicates that a level was completed. We are planning to implement features for defining a rectangular crop of the screen and comparing hashes for these crops rather than the full screen.

Another limitation that requires tuning is that scraped frames may have slight differences or artifacts than the frame in the playthrough. For example, the frame may contain the current player's health bar such as in *Kirby's Dream Land*, which may differ from the health bar in the walkthrough at that frame. Other issues include different aspect resolutions from scraped walkthroughs, all of which can be solved with manual tuning. We want to provide a robust system for automatic checkpoint detection as scores on VideoGameBench continue to improve.

## C.6 BENCHMARK STATISTICS

We provide a distribution for the length of each game in VideoGameBench, as well as the checkpoints scraped for the test split. In Figure 5, we show the distribution of checkpoints on VideoGameBench.

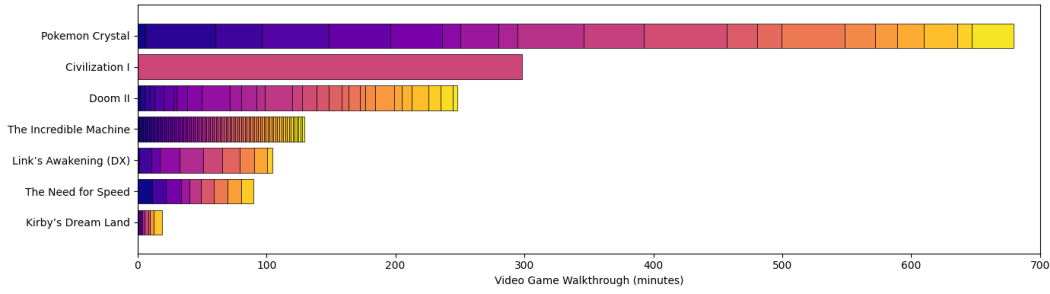

Figure 5: **VideoGameBench checkpoint lengths.** We show the length of each game walkthrough and the position of each checkpoint as a black divider. Checkpoints in VideoGameBench are mapped to the timestamp it was scraped from in an online walkthrough video to determine the percentage of the game that was completed.

### C.7 LINKS TO WALKTHROUGHS

We provide links in Table 7 to all walkthroughs used for scraping checkpoints, as well as estimating game lengths. Each of these walkthroughs assumes full knowledge of the game and does not consider time spent exploring.

Table 7: List of longplay walkthrough links for scraping checkpoints on VideoGameBench.

| Test Set Games                   | Walkthrough Link                                                                                      |
|----------------------------------|-------------------------------------------------------------------------------------------------------|
| Legend of Zelda DX               | <a href="https://www.youtube.com/watch?v=rLFXGs1Rr6c">https://www.youtube.com/watch?v=rLFXGs1Rr6c</a> |
| Doom II                          | <a href="https://www.youtube.com/watch?v=nhmRxPf02JA">https://www.youtube.com/watch?v=nhmRxPf02JA</a> |
| Kirby's Dream Land DX            | <a href="https://www.youtube.com/watch?v=n8CSolb0hjc">https://www.youtube.com/watch?v=n8CSolb0hjc</a> |
| Civilization I                   | <a href="https://www.youtube.com/watch?v=XnfkrhREDDM">https://www.youtube.com/watch?v=XnfkrhREDDM</a> |
| Need for Speed                   | <a href="https://www.youtube.com/watch?v=1Sf7_TbG8Js">https://www.youtube.com/watch?v=1Sf7_TbG8Js</a> |
| The Incredible Machine           | <a href="https://www.youtube.com/watch?v=pTbSMKQ_rU">https://www.youtube.com/watch?v=pTbSMKQ_rU</a>   |
| Pokémon Crystal                  | <a href="https://www.youtube.com/watch?v=HQEaaTuyKAM">https://www.youtube.com/watch?v=HQEaaTuyKAM</a> |
| Dev Set Games                    |                                                                                                       |
| Doom                             | <a href="https://www.youtube.com/watch?v=Q4GiCg_m8wA">https://www.youtube.com/watch?v=Q4GiCg_m8wA</a> |
| Quake                            | <a href="https://www.youtube.com/watch?v=Y8k9c-6Me_A">https://www.youtube.com/watch?v=Y8k9c-6Me_A</a> |
| Civilization                     | <a href="https://www.youtube.com/watch?v=o6_5PIsJkYk">https://www.youtube.com/watch?v=o6_5PIsJkYk</a> |
| Warcraft II                      | <a href="https://www.youtube.com/watch?v=DWjZQzviTUs">https://www.youtube.com/watch?v=DWjZQzviTUs</a> |
| The Oregon Trail Deluxe          | <a href="https://www.youtube.com/watch?v=FaWmldKoo9Y">https://www.youtube.com/watch?v=FaWmldKoo9Y</a> |
| X-COM UFO Defense                | <a href="https://shorturl.at/BPIEb">https://shorturl.at/BPIEb</a>                                     |
| Scooby Doo: Classic Creep Capers | <a href="https://www.youtube.com/watch?v=yYfpaz9NwU8">https://www.youtube.com/watch?v=yYfpaz9NwU8</a> |
| Prince of Persia                 | <a href="https://www.youtube.com/watch?v=qMOBiT3F6AM">https://www.youtube.com/watch?v=qMOBiT3F6AM</a> |
| Age of Empires                   | <a href="https://www.youtube.com/watch?v=hqsbQzpFRBI">https://www.youtube.com/watch?v=hqsbQzpFRBI</a> |
| Pokémon Red                      | <a href="https://www.youtube.com/watch?v=hYcotDHI0dg">https://www.youtube.com/watch?v=hYcotDHI0dg</a> |
| Super Mario Land                 | <a href="https://www.youtube.com/watch?v=vfaV2VDBQEk">https://www.youtube.com/watch?v=vfaV2VDBQEk</a> |
| Castlevania: The Adventure       | <a href="https://www.youtube.com/watch?v=oL5TwYG0iQ8">https://www.youtube.com/watch?v=oL5TwYG0iQ8</a> |
| Donkey Kong Land 2               | <a href="https://www.youtube.com/watch?v=tqUU9pwUxQo">https://www.youtube.com/watch?v=tqUU9pwUxQo</a> |
| Mega Man: Dr. Wily's Revenge     | <a href="https://www.youtube.com/watch?v=wpwESPNjAk0">https://www.youtube.com/watch?v=wpwESPNjAk0</a> |

## D EXPERIMENT DETAILS

In this section, we provide additional information on the experiments in § 4. We provide criterion we used to determine the end of a run, cost information for the main experiments, and a variance analysis of for the best performing model.



## D.1 CRITERION FOR ENDING RUNS

Due to budget constraints, the experiments in § 4 were ended when the agent was stuck or not progressing for a certain period of time. In this section, we detail exactly the constraints we used per game to determine whether a run should be pre-maturely ended. We ended a run if:

1. The agent **quits the emulator or puts the game in a “locked” state**. In DOS or GBA games, if the agent quits the entire game (which requires multiple steps), it is unable to restart the game.
2. The game provides the agent multiple lives, and the agent has a “Game Over” screen by losing them all (e.g. *Kirby’s Dream Land* and *Super Mario Land*). Otherwise, if the agent loses in the same location more than three times, we also end the run.
3. The agent is “stuck” (i.e. the exact same screen) for more than 100 steps. We reason that the context window is only 20 steps, so the conditional probability on this context of getting unstuck is low.
4. The agent loses without damaging any enemies, indicating little progress can be made in multiple repeated trials.
5. The agent uses \$30 ( $\sim 2000$  steps) without reaching a new checkpoint. This was mainly to avoid long loops like in *Doom II* where the agent repeatedly revisits the same locations.

## D.2 MAIN VIDEOGAMEBENCH EXPERIMENTS COST

We report the cost per experiment of Table 2. Discrepancies in costs do not necessarily reflect differences in model costs – rather, some runs were ended early according to the criteria in Appendix D.1. Note because these criteria were not automatically checked, some runs may have run for slightly longer and therefore incurred a slightly higher cost. We observed that in practice this extra amount of time did not influence or change any of the results.

Table 8: API cost of each run on the VideoGameBench test split from Table 2 in USD(\$). Note that some runs were ended early when the agent was stuck or making no meaningful progress. Certain models are also significantly cheaper per token than others. The locally-hosted Qwen models do not have associated API costs.

| VideoGameBench         | GPT-4o  | Sonnet 3.7 | Gemini 2.5 Pro | LLaMA 4 | Gemini 2.0 Flash |
|------------------------|---------|------------|----------------|---------|------------------|
| Civilization I         | \$14.46 | \$30.00    | \$5.29         | \$0.42  | \$10.05          |
| The Need for Speed     | \$0.50  | \$0.62     | \$0.38         | \$0.04  | \$0.08           |
| The Incredible Machine | \$1.36  | \$5.26     | \$1.31         | \$0.11  | \$0.18           |
| Pokemon Crystal        | \$15.04 | \$29.64    | \$4.78         | \$0.14  | \$3.88           |
| Doom II                | \$0.17  | \$0.40     | \$3.79         | \$0.03  | \$0.01           |
| Kirby’s Dream Land     | \$8.91  | \$2.98     | \$3.89         | \$0.09  | \$0.16           |
| Link’s Awakening (DX)  | \$7.86  | \$20.00    | \$18.51        | \$0.09  | \$0.18           |

## D.3 VARIANCE ANALYSIS FOR MAIN EXPERIMENTS

Using the best performing agent on VideoGameBench (Gemini 2.5 Pro), we re-run experiments five times for *Kirby’s Dream Land*, which is the only game where the agent reaches a checkpoint (it completes 4.8% of the game). We also re-run experiments five times for *Doom II* and *The Incredible Machine*, where the agent had no progress. In five runs, the sample variance on *Doom II* and *The Incredible Machine* is 0, while for *Kirby’s Dream Land* it is 0.2.

## D.4 ESTIMATING “EXACT” PROGRESS ON MAIN EXPERIMENTS

Many models achieve a score of “0%” on most games in VideoGameBench and VideoGameBench-Lite due to our coarse-grained scoring scheme of rewarding major checkpoints. To justify these scores and our qualitative analysis, we provide a finer-grained scoring scheme by manually matching the furthest frame or location that a model was able to achieve to when a player in the walkthroughs used in Table 7 reached that point in the game. Below, we show the “exact” estimated progress of the experiments in Section 4.



Table 9: We take one of the best performing models on VideoGameBench, Gemini 2.5 Pro, and re-run it five times on *Kirby*, which is the only game where it reached at least one checkpoint. We also run it five times on two games, *Doom II* and *The Incredible Machine*, where it had no progress.

| Gemini 2.5 Pro on VideoGameBench | Run 1 | Run 2 | Run 3 | Run 4 | Run 5 |
|----------------------------------|-------|-------|-------|-------|-------|
| Kirby’s Dream Land               | 1     | 0     | 1     | 1     | 1     |
| The Incredible Machine           | 0     | 0     | 0     | 0     | 0     |
| Doom II                          | 0     | 0     | 0     | 0     | 0     |

Table 10: We report the exact estimated performance on VideoGameBench test split (not including secret games). Each score is displayed as a percentage of the furthest game state that the agent achieved, manually estimated based on exactly where this state appears in the walkthrough videos described in Table 7. Civilization I in particular is very noisy due to the randomness of each game.

| VideoGameBench          | GPT-4o       | Sonnet 3.7   | Gemini 2.5 Pro | LLaMA 4 | Gemini 2.0 Flash | QwenVL-2.5 7B | QwenVL-2.5 32B |
|-------------------------|--------------|--------------|----------------|---------|------------------|---------------|----------------|
| Civilization I          | <b>1.99%</b> | 0.91%        | 0.18%          | 1.02%   | 0%               | 0.18%         | 0.91%          |
| The Need for Speed      | <b>0.67%</b> | 0.07%        | 0.39%          | 0.07%   | 0.52%            | 0.00%         | 0.02%          |
| The Incredible Machine  | 0.00%        | <b>0.10%</b> | 0.00%          | 0.00%   | 0.00%            | 0.00%         | 0.00%          |
| Pokemon Crystal         | <b>1.04%</b> | 0.37%        | 0.37%          | 0.37%   | 0.48%            | 0.37%         | 0.26%          |
| Doom II                 | 0.12%        | 0.13%        | <b>0.17%</b>   | 0.12%   | 0.12%            | 0.12%         | 0.12%          |
| Kirby’s Dream Land (DX) | 2.89%        | <b>5.07%</b> | <b>5.07%</b>   | 2.45%   | 2.89%            | 2.10%         | 2.89%          |
| Link’s Awakening (DX)   | 0.65%        | <b>0.85%</b> | <b>0.85%</b>   | 0.65%   | 0.65%            | 0.65%         | 0.65%          |
| Overall Score           | 1.05%        | <b>1.07%</b> | 1.00%          | 0.67%   | 0.67%            | 0.49%         | 0.69%          |

Table 11: We report the exact estimated performance on VideoGameBench Lite test split (not including secret games), where the game emulator pauses while waiting for a model’s action. Each score is displayed as a percentage of the furthest game state that the agent achieved, manually estimated based on exactly where this state appears in the walkthrough videos described in Table 7. 100% indicates a completed game.

| VideoGameBench Lite   | GPT-4o | Sonnet 3.7   | Gemini 2.5 Pro | LLaMA 4 | Gemini 2.0 Flash | QwenVL-2.5 7B | QwenVL-2.5 32B |
|-----------------------|--------|--------------|----------------|---------|------------------|---------------|----------------|
| Doom II               | 0.24%  | <b>0.34%</b> | 0.18%          | 0.12%   | 0.13%            | 0.12%         | 0.17%          |
| Kirby’s Dream Land    | 5.07%  | 5.07%        | <b>5.42%</b>   | 2.45%   | 2.89%            | 2.89%         | 3.50%          |
| Link’s Awakening (DX) | 0.67%  | 0.81%        | <b>0.85%</b>   | 0.65%   | 0.65%            | 0.65%         | 0.65%          |
| Overall Score         | 1.99%  | 2.07%        | <b>2.15%</b>   | 1.07%   | 1.22%            | 1.22%         | 1.44%          |

## E QUALITATIVE ANALYSIS

We provide specific examples of trajectories taken when generating Table 2 and Table 3. These examples provide qualitative evidence to support claims made in § 4.2. Many of the examples below can be attributed to a combination of issues, but we highlight the specific failure mode described with example(s).

### E.1 THE KNOWING-DOING GAP.

Similar to the findings in Paglieri et al. (2025), we found that models often struggle to execute the correct actions despite broadly knowing what to do.

In the example below, we show how a frontier VLM (Llama 4 Maverick) writes out what it should be doing (e.g. moving down towards the door to exit the room and explore outside) but it repeatedly presses "down" on the agent without aligning it actually face the door. In the rest of the trajectory, the agent continually repeats this action and is stuck on the same screen.

Furthermore, there are several reasons that suggest that the issue is not just the model’s inability to perceive the screen. Firstly, the VG-Agent scaffold has access to all previous frames and actions, and can see that the screen is not changing despite it attempting to move out the room – even a human with poor perception would recognize that the door must be somewhere else if the screen has not changed in multiple steps. Secondly, in this particular example, the agent actually acknowledges earlier that the door is to the bottom-left of the character, but still chooses to “move down” to reach the door.

1782  
1783  
1784  
1785  
1786  
1787  
1788  
1789  
1790  
1791  
1792  
1793  
1794  
1795  
1796  
1797  
1798  
1799  
1800  
1801  
1802  
1803  
1804  
1805  
1806  
1807  
1808  
1809  
1810  
1811  
1812  
1813  
1814  
1815  
1816  
1817  
1818  
1819  
1820  
1821  
1822  
1823  
1824  
1825  
1826  
1827  
1828  
1829  
1830  
1831  
1832  
1833  
1834  
1835

**Llama 4 Maverick playing *The Legend of Zelda: Link's Awakening* (VideoGameBench). Step 130**

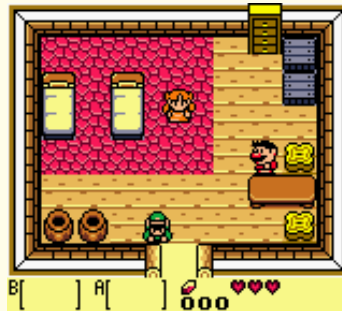

Thought (after image)

The current screen shows Link standing near the exit of the house. To progress, I need to exit the house by moving down.

Action (after image)

DOWN

**E.2 FRONTIER MODELS STRUGGLE TO CORRECTLY PROCESS VISUAL INPUTS.**

The following example shows an example of the model struggling to understand the screen. After clearing the starting room on the first level of *Doom II*, the Gemini 2.0 Flash VG-Agent continues firing at the enemies, and outputs that it thinks “the enemy is still alive. I need to adjust aim again and fire.” In this trajectory, the agent eventually wastes all of its ammo and gets stuck in the first room.

**Gemini 2.0 Flash on *Doom II* (VideoGameBench Lite). Step 305**

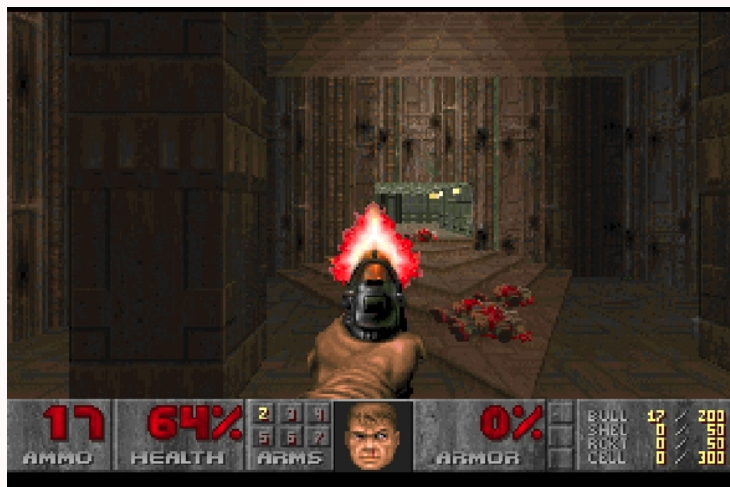

Thought (after image)

I have adjusted aim slightly to the left and fired, but the enemy is still alive. I need to adjust aim again and fire.

1836  
1837  
1838  
1839  
1840  
1841  
1842  
1843  
1844  
1845  
1846  
1847  
1848  
1849  
1850  
1851  
1852  
1853  
1854  
1855  
1856  
1857  
1858  
1859  
1860  
1861  
1862  
1863  
1864  
1865  
1866  
1867  
1868  
1869  
1870  
1871  
1872  
1873  
1874  
1875  
1876  
1877  
1878  
1879  
1880  
1881  
1882  
1883  
1884  
1885  
1886  
1887  
1888  
1889

Reflection (after image)

Goal: Complete the game by defeating all the levels, exploring all rooms... Now I need to re-aim to the other enemy and fire again. The enemy is still slightly to the left, so I will adjust my aim and fire.  
n- I have adjusted aim slightly to the left and fired, but the enemy is still alive. I need to adjust aim again and fire.

Action (after image)

press\_key: ArrowLeft, Control (fire gun)

In the next example, GPT-4o gets confused trying to interact with an NPC in *The Legend of Zelda*. In this room, the agent must first talk to the man on the right before they can leave the room. After exploring the starter room, the agent realizes it needs to talk to the NPC to grab a shield item. It sees that it is near the NPC and continues to believe that it is interacting with the NPC despite no dialogue appearing. It continues this behavior until later attempting to exit after falsely believing it has spoken to the NPC.

**GPT-4o on *The Legend of Zelda: Link's Awakening* (VideoGameBench). Step 309**

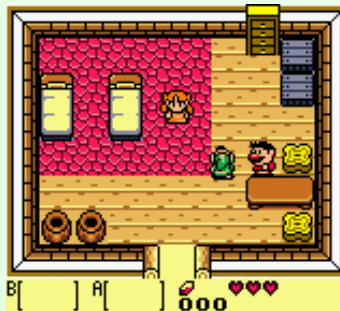

Thought (after image)

**\*\*Current Situation and Strategy:\*\***

- Link is still beside the NPC. No visual confirmation of the shield yet.
- Primary goal remains to acquire the shield from the NPC.
- Continuing to engage with the NPC is necessary.

**\*\*Next Steps:\*\***

1. **\*\*Press "A" repeatedly\*\*** to complete the dialogue.
2. **\*\*Ensure the shield is obtained and visible\*\*** in Link's inventory.
3. Once the shield is confirmed, plan to exit the house.

Reflection (after image)

- Must confirm shield acquisition before leaving the house.
- Pressing "A" multiple times ensures the dialogue is complete.
- Next objective is to explore outside once the shield is obtained.
- Focus on completing the dialogue and shield acquisition.
- Ensure shield acquisition is confirmed visually before proceeding.
- Once confirmed, plan the path to exit the house.
- Current priority is obtaining the shield from the NPC.

1890  
1891  
1892  
1893  
1894  
1895  
1896  
1897  
1898  
1899  
1900  
1901  
1902  
1903  
1904  
1905  
1906  
1907  
1908  
1909  
1910  
1911  
1912  
1913  
1914  
1915  
1916  
1917  
1918  
1919  
1920  
1921  
1922  
1923  
1924  
1925  
1926  
1927  
1928  
1929  
1930  
1931  
1932  
1933  
1934  
1935  
1936  
1937  
1938  
1939  
1940  
1941  
1942  
1943

Action (after image)

```
"A", # Initiate or continue dialogue.  
"A", # Ensure dialogue completion.  
"A"  # Final confirmation for shield.
```

### E.3 VG-AGENT LACKS PLANNING AND MEMORY MANAGEMENT ABILITIES

We first expand on the example provided in the main paper, and also provide a visually obvious example below. In the *Doom II* on VideoGameBench Lite example, we found that all agents did not explicitly track or map out their surroundings. For agents that survived all the enemies, they often repeatedly walked back and forth between the starting area and first corridor, never making it to the ending area. For context, the first checkpoint / level of *Doom II* only requires taking two turns down a hallway and was completed by a co-author with no prior game experience in under 20 seconds.

We show another qualitative example below of *GPT-4o* on *Pokemon Crystal* forgetting that it had collected its first Pokemon after the first checkpoint, as well as forgetting its objective was to run an errand. It overwrites its textual scratch pad memory (the reflection) for a local objective, forgetting what it was trying to do.

#### GPT-4o on *Pokemon Crystal* (VideoGameBench). Step 698

Thought (before image)

```
1. **Current Situation**: Still trying to exit the lab.  
2. **Objective**: Leave the lab to head towards Mr. Pokémon's  
house.  
3. **Analysis**: Ensure proper alignment with the exit carpet and  
attempt to move down.
```

Reflection (before image)

- Received Cyndaquil as my starter Pokémon.
- Skipped the nickname option to proceed quickly.
- Objective: Visit Mr. Pokémon as directed by PROF. ELM.
- Need to exit the lab and start the journey towards Mr. Pokémon's location.
- Route to Mr. Pokémon goes through Cherrygrove City.
- Learned to heal Pokémon with the lab machine if needed.
- Currently finishing dialogue with the lab assistant.
- Received a Potion from the assistant, which is now in the ITEM POCKET.
- Currently engaged in a dialogue about the lab staff being busy.
- Attempting to exit the lab to begin the journey.

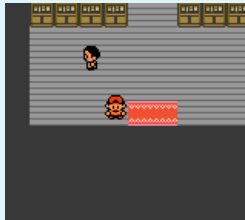

1944  
1945  
1946  
1947  
1948  
1949  
1950  
1951  
1952  
1953  
1954  
1955  
1956  
1957  
1958  
1959  
1960  
1961  
1962  
1963  
1964  
1965  
1966  
1967  
1968  
1969  
1970  
1971  
1972  
1973  
1974  
1975  
1976  
1977  
1978  
1979  
1980  
1981  
1982  
1983  
1984  
1985  
1986  
1987  
1988  
1989  
1990  
1991  
1992  
1993  
1994  
1995  
1996  
1997

Thought (after image)

**\*\*Step-by-Step Plan:\*\***  
  
1. **\*\*Current Situation\*\***: Stuck at the lab exit.  
2. **\*\*Objective\*\***: Exit the lab and start the journey to Mr. Pokémon's house.  
3. **\*\*Analysis\*\***: Confirm alignment with the exit and check potential obstacles.

Reflection (after image)

- Need to ensure proper alignment and navigation to exit buildings.
- Current focus is on successfully leaving the lab to progress the storyline.
- Stuck at the exit requires paying attention to visual cues for proper movement.

Action (after image)

UP, DOWN, DOWN

## F PRACTICE GAMES

In this section, we expand on our three practice games defined in §4 and Table 4. We also verify that each game is solvable by humans playing through the VideoGameBench interface.

### F.1 LOCATION CLICKING GAME

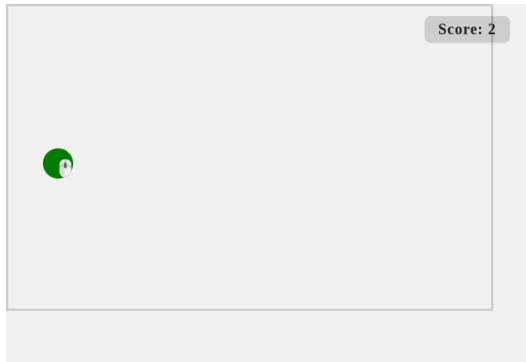

Figure 6: An example screen of the *Location Clicking Game*. A VG-Agent using a VLM is tasked with clicking 10 green circles, one at a time, in under 250 actions.

The most basic action in any DOS game is to click a position on the screen. The *Location Clicking Game* is a simple task where an agent must click a green circle with radius 40px that randomly generates inside a 640px by 400px region on the browser (this replicates the DOS game setting on VideoGameBench that runs inside a 640px by 400px window). Each time the agent clicks the circle, it respawns in a new location, and the agent must click the circle 10 times in under 250 actions. While some VLMs such as Claude Sonnet 3.7 and Gemini 2.5 Pro do not struggle with this task, many frontier VLMs require multiple correction steps to click the circle, and cannot complete the game in under 250 actions.

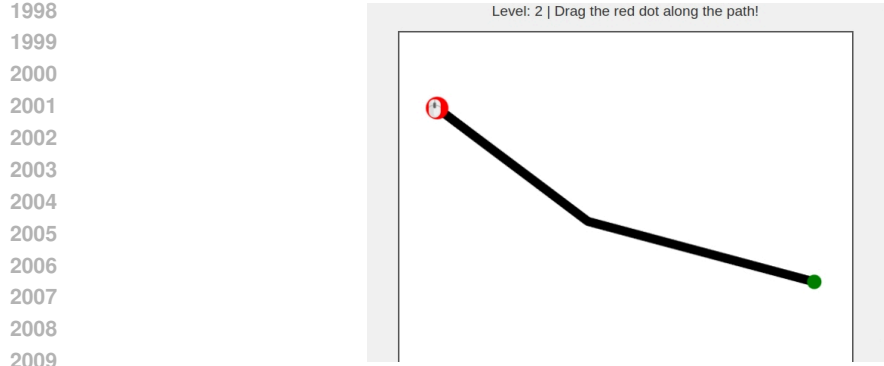

Figure 7: An example screen of the *Mouse Dragging Game*. A VG-Agent using a VLM is tasked with dragging a red circle to a target green circle while staying on the black line.

## F.2 DRAGGING GAME

The VideoGameBench mouse and keyboard interface currently supports dragging the mouse from a position  $(x_0, y_0)$  on the screen to another position  $(x_1, y_1)$  in a straight line. Many games in VideoGameBench such as *The Incredible Machine* and *Age of Empires* require or allow dragging the mouse to play the game. On the *Mouse Dragging Game*, we devised 10 simple challenges for an agent to drag in a certain pattern. We find that all VLMs struggle on this challenge, with only Claude Sonnet 3.7 even completing the first level, which is just to drag in a straight horizontal line.

## F.3 2D NAVIGATION GAME

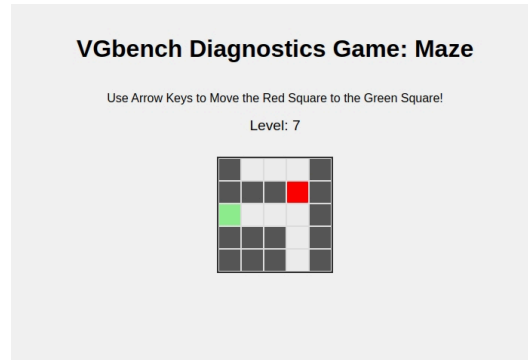

Figure 8: An example level in the *2D Navigation Game*. The task is to use the arrow keys (mouse + keyboard interface on VideoGameBench) to move a red square to the green square in a small grid-world maze.

In many DOS and Game Boy games in VideoGameBench, the agent must move a character in a 2D (often grid-world, e.g. *Pokemon Crystal*) environment. While this task is often easy for specialized agents, for VLMs it is not obvious that this task is easily solved. We generate 10 pre-defined mazes where the agent must move a red square to the green square in a small maze-like environment using the arrow keys. There are movable tiles (light gray) and immovable tiles (dark gray) that the agent must navigate. Although each maze can be solved in under 10 steps, we find that no agent can complete the entire game in under 250 actions, i.e. 25 steps per maze.
